# Supplementary material for: Amphiphilic copolymer coated upconversion nanoparticles for near-infrared light-triggered dual anticancer treatment
Source: Royal Society of Chemistry journal article supplement (doi:10.1039/c4nr05305b), 2014-01-01
Supplement: c4nr05305b1.pdf [file c4nr05305b1.pdf]

# Amphiphilic Copolymer Coated Upconversion Nanoparticles for Near-Infrared Light-Triggered Dual Anticancer Treatment

*Shun Yang*<sup>a</sup>, *Najun Li*<sup>\*a</sup>, *Zhuang Liu*<sup>b</sup>, *Wenwei Sha*<sup>a</sup>, *Dongyun Chen*<sup>a</sup>, *Qingfeng Xu*<sup>a</sup>  
and *Jianmei Lu*<sup>\*a</sup>

<sup>a</sup> College of Chemistry, Chemical Engineering and Materials Science, Collaborative Innovation Center of Suzhou Nano Science and Technology, Soochow University, Suzhou, 215123, China

<sup>b</sup> Functional Nano & Soft Materials Laboratory (FUNSOM) and Jiangsu Key Laboratory for Carbon-Based Functional Materials & Devices, Soochow University, Suzhou, Jiangsu 215123, China

E-mail: [lujm@suda.edu.cn](mailto:lujm@suda.edu.cn), [linajun@suda.edu.cn](mailto:linajun@suda.edu.cn); Fax: +86 (0) 512-6588 0367; Tel: +86 (0)512-6588 0368

## Supplementary Information

*Mn*<sup>2+</sup> ion-doped *NaY(Mn)F<sub>4</sub>:Yb/Er* nanocrystals (UCNPs) were prepared according to literature with some modification. In brief, 1.2 mL of 0.5 M *MnCl<sub>2</sub>*, 2 mL of 0.5 M *Y(NO<sub>3</sub>)<sub>3</sub>*, 1.8 mL of 0.2 M *Yb(NO<sub>3</sub>)<sub>3</sub>*, and 0.2 mL of 0.2 M *Er(NO<sub>3</sub>)<sub>3</sub>* were added to a mixture of NaOH (0.6 g), deionized water (3.0 mL), oleic acid (10 mL) and ethanol (20 mL) under stirring. 4 mL of deionized water containing 8 mmol of NaF was then dropwisely added into the mixture. After vigorous stirring for 15 min at room temperature, the colloidal solution was transferred into a 60 mL Teflon-lined autoclave,

which was sealed and heated at 200 °C for 8 h. The system was then allowed to cool naturally to roomtemperature. The final product was collected by centrifugation; and then washed with ethanol and deionized water several times to remove any possible remnants. The obtained UCNPs could be re-dispersed in various non-polar organic solvents.

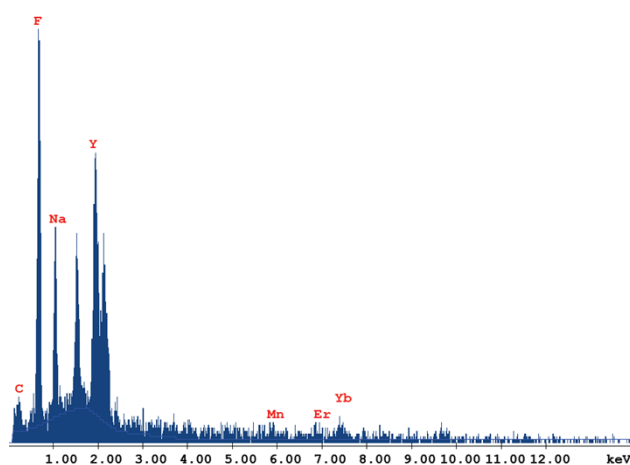

Figure S1 EDS spectrum of UCNPs.

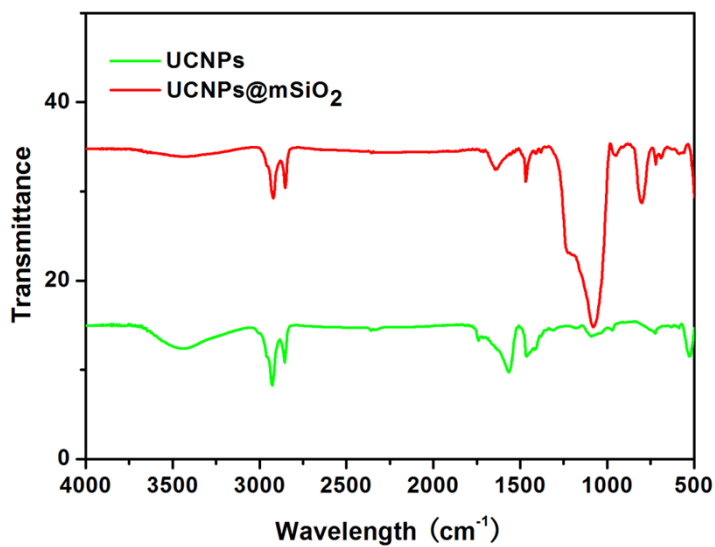

Figure S2 FT-IR spectra of UCNPs and UCNPs@SiO<sub>2</sub>.

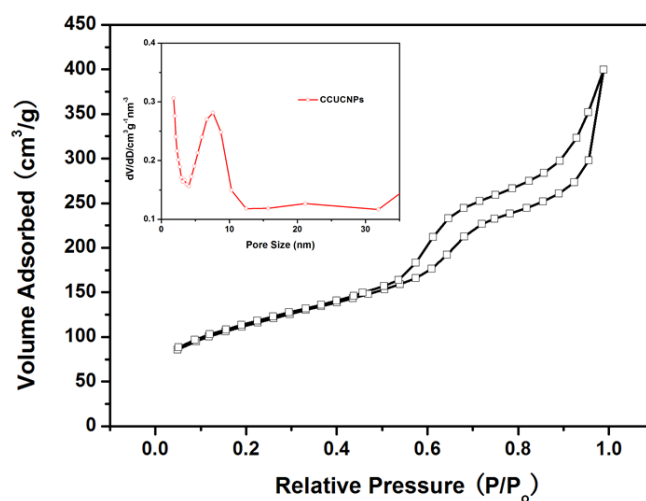

**Figure S3** N<sub>2</sub> adsorption–desorption isotherm and the corresponding pore size distribution inset of CCUCNPs.

*Synthesis of hydrophobic monomer 3-((10-(3-(methacryloyloxy)propoxy) anthracen-9-yl)oxy) propyl stearate (MAPS):* 3-Chloro-1-propanol (10 g, 0.1mol) and sodium iodide (60 g, 0.4 mol) were added to dry acetone (100 mL) and stirred at 60 °C under N<sub>2</sub> for 24 h. The mixture was filtered and the solvent evaporated. Then, a 1:1 mixture of diethyl ether/hexane was added and stirred for 10 min and then filtered. The solution was washed with a dilute sodium thiosulfate solution followed by water and then brine. The organic layer was dried with MgSO<sub>4</sub>, filtered and the solvent evaporated in vacuum giving a pale yellow liquid (12.4 g, 67%). <sup>1</sup>HNMR (400 MHz, CDCl<sub>3</sub>), δ (ppm): 3.74 (t, 2H, CH<sub>2</sub>OH), 3.29 (t, 2H, CH<sub>2</sub>I), 2.09 (m, 2H, CH<sub>2</sub>CH<sub>2</sub>CH<sub>2</sub>).

*9, 10-Bis(3-hydroxypropyloxy) anthracene:* Nitrogen-saturated water (150 mL) and CH<sub>2</sub>Cl<sub>2</sub> (150 mL) was added to a mixture of 9,10-anthraquinone (2.57 g, 12.36 mmol), Na<sub>2</sub>S<sub>2</sub>O<sub>4</sub> (4.3 g, 24.7 mmol) and Adogen 464 (4.64 g, 10 mmol). The mixture was stirred for 5 min and then NaOH (4.94 g, 123.5 mmol) was added. Stirring was continued for 10 min and 3-Iodo-1-propanol was added dropwise. The mixture was

stirred overnight at 25 °C. Then the phase was separated and the water phase was washed with CH<sub>2</sub>Cl<sub>2</sub>. The combined organic phases were washed with water and dried over MgSO<sub>4</sub>. The solution volume was reduced to 40 mL and the product was precipitated overnight at -20 °C. The solid was purified by column chromatography with a mixture of ethyl acetate/CH<sub>2</sub>Cl<sub>2</sub> (1/4, v/v) Yield 1.13 g, 28%; (<sup>1</sup>HNMR (400 MHz, DMSO-*d*<sub>6</sub>), δ (ppm): 8.24 (dd, J=6.8, 3.2 Hz, 4H, anthracene), 7.52 (dd, J=6.8, 3.2 Hz, 4H, anthracene), 4.63 (t, J=5.2 Hz, 2H, CH(O)), 4.16 (t, J=6.5 Hz, 4H, OCH<sub>2</sub>CH<sub>2</sub>), 3.76 (m, CH<sub>2</sub>CH<sub>2</sub>OH, 4H), 2.1 (m, CH<sub>2</sub>CH<sub>2</sub>CH<sub>2</sub>, 4H).

9,10-Bis(3-hydroxypropyloxy) anthracene (0.4 g, 1.22 mmol) and pyridine (0.1 g, 1.22 mmol) were dissolved into dry CH<sub>2</sub>Cl<sub>2</sub> (100 mL), then stearyl chloride (0.185 g, 0.61 mmol) was added dropwise to the solution under a nitrogen atmosphere. The mixture was stirred at room temperature for 2 hours. The product was purified by column chromatography with a mixture of ethyl acetate/CH<sub>2</sub>Cl<sub>2</sub> (1/20, v/v) and dried in a vacuum to get 3-((10-(3-hydroxypropoxy) anthracen-9-yl)oxy) propyl stearate. Yield: 0.25 g (0.42 mmol, 36%). Then the product (0.25 g, 0.42 mol) and triethylamine (0.101 g, 1 mmol) were dissolved into dry CH<sub>2</sub>Cl<sub>2</sub> (50 mL), then Methacryloyl chloride (0.104 g, 1 mmol) was added dropwise to the solution under a nitrogen atmosphere. The mixture was stirred at room temperature for 12 hours. The product was purified by column chromatography with a mixture of ethyl acetate/CH<sub>2</sub>Cl<sub>2</sub>(1/20,v/v) and dried in a vacuum to get 3-((10-(3-(methacryloyloxy)propoxy) anthracen-9-yl)oxy) propyl stearate (MAPS). Yield: Yellow solid, 0.145 g (0.22 mmol), 52%. <sup>1</sup>HNMR (400 MHz, DMSO-*d*<sub>6</sub>): 8.24 (d,

4H, anthracene), 7.48 (d, 4H, anthracene), 6.18 (s, 1H, CCH<sub>2</sub>), 5.60 (s, 1H, CCH<sub>2</sub>), 4.64 (t, J=6.0, 2H, CH<sub>2</sub>OCO), 4.53 (t, J=6.4, 2H, CH<sub>2</sub>OCO), 4.29 (m, 4H, CH<sub>2</sub>CH<sub>2</sub>O), 2.45-2.35 (m, 6H, CH<sub>2</sub>CH<sub>2</sub>OCO, COCH<sub>2</sub>CH<sub>2</sub>), 2.01 (s, 3H, CH<sub>3</sub>), 1.69-1.65(m, 2H, CH<sub>2</sub>CH<sub>2</sub>CH<sub>2</sub>), 1.29-1.25(m, 30H, CH<sub>2</sub>), 0.88 (t, J=13.2, 3H, CH<sub>2</sub>CH<sub>3</sub>)

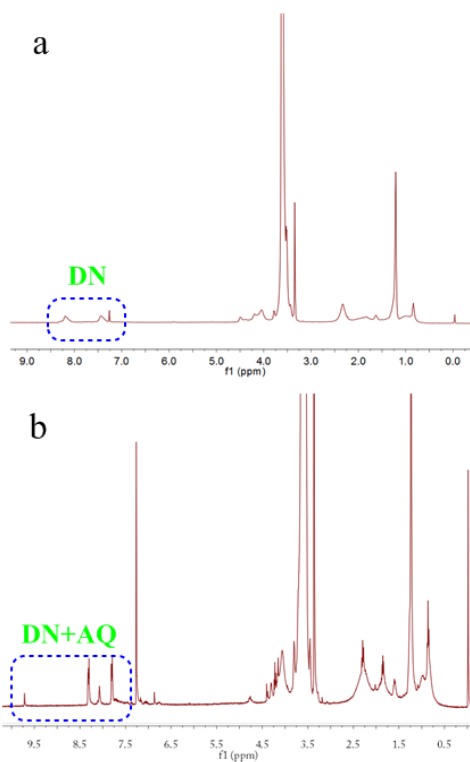

Figure S4 <sup>1</sup>H NMR spectrum of PM and photocleavage of PM

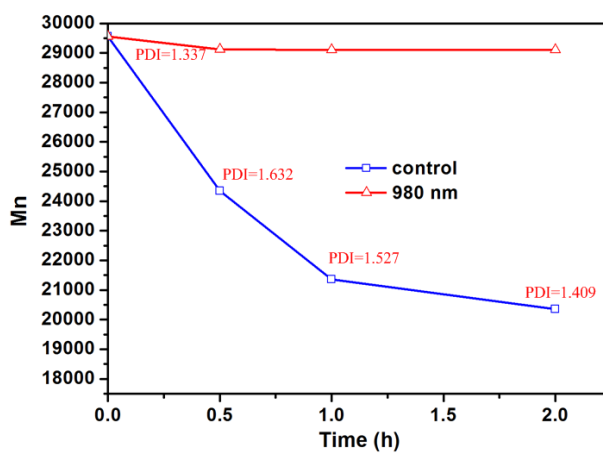

Figure S5 The decreased Mn of PM under <sup>1</sup>O<sub>2</sub>

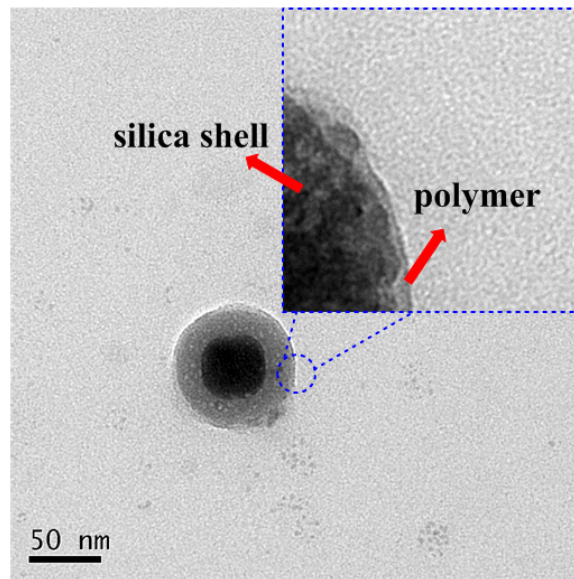

**Figure S6** TEM of CCUCNPs@PM, inset:enlarged TEM images of CCUCNPs@PM

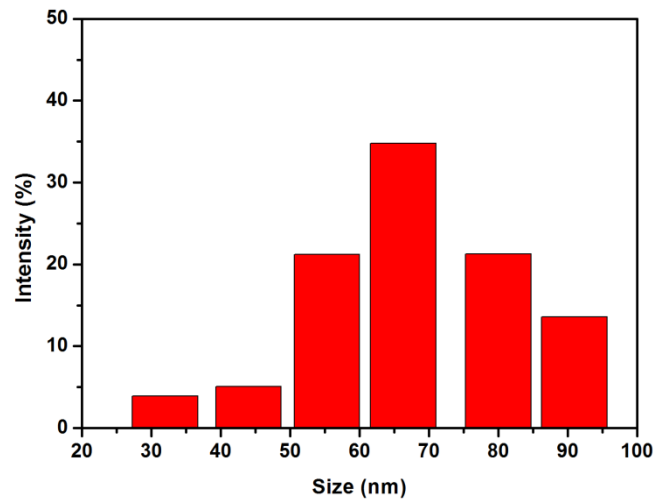

**Figure S7** DLS of CCUCNPs@PM

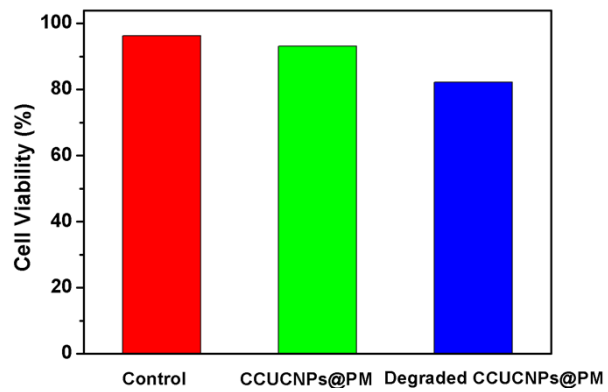

**Figure S8** The toxicity of nanocomposite after degradation

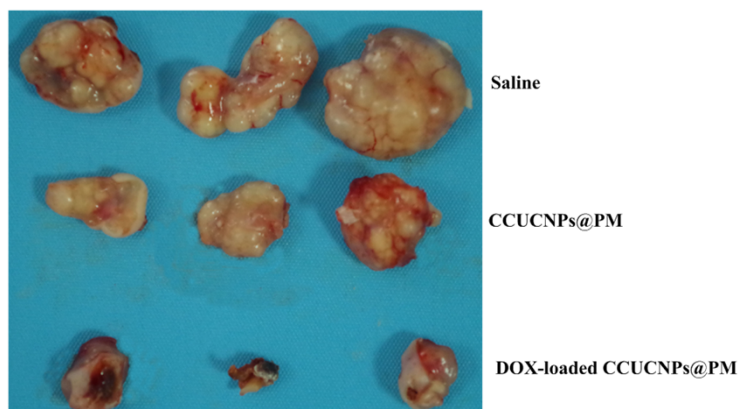

**Figure S9** Photograph of the tumor tissue from sacrificed animal
